# Supplementary material for: Circ_0047339 promotes the activation of fibroblasts and affects the development of urethral stricture by targeting the miR-4691-5p/TSP-1 axis
Source: PubMed Central journal article supplement (PMC9428161; doi:10.1038/s41598-022-19141-4), 2022-08-30
Supplement: 41598_2022_19141_MOESM1_ESM.pdf [file 41598_2022_19141_MOESM1_ESM.pdf]

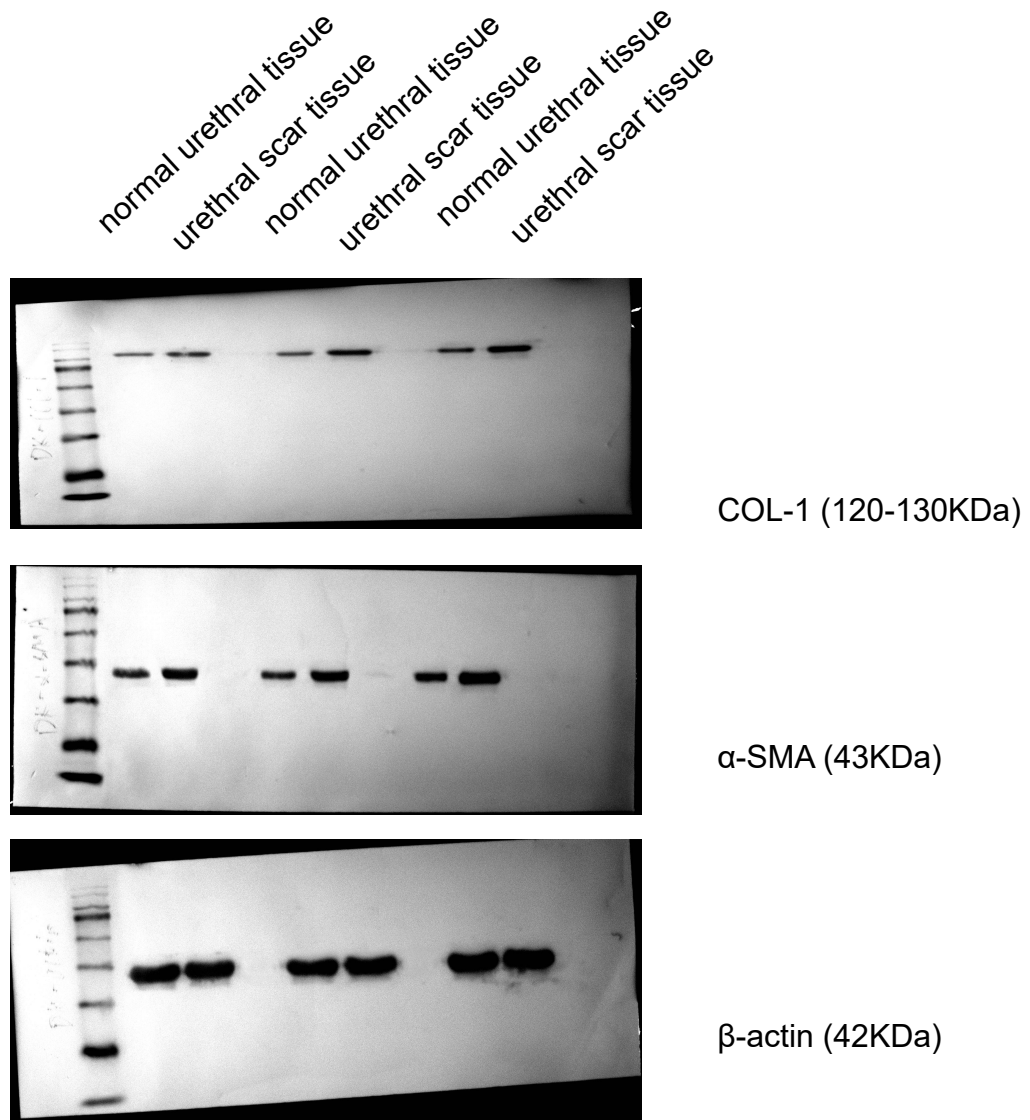

Figure S1 Un-cropped image of Figure 3A
